# Supplementary material for: Host and parasite genetics shape a link between Trypanosoma cruzi infection dynamics and chronic cardiomyopathy
Source: PubMed Central journal article supplement (PMC5031194; doi:10.1111/cmi.12584), 2016-05-25
Supplement: CMI-18-1429-s005.pdf [file CMI-18-1429-s005.pdf]

**Table S1. Summary of tissue-specific chronic infection frequencies across *T. cruzi* – mouse strain combinations**

| Study            | Experiment Parameters  |             |                             |                 | Percent of animals bioluminescence positive |      |        |     |    |     |     |     |          |      |
|------------------|------------------------|-------------|-----------------------------|-----------------|---------------------------------------------|------|--------|-----|----|-----|-----|-----|----------|------|
|                  | <i>T. cruzi</i> strain | Mouse (F/M) | Inoculum                    | n <sup>a</sup>  | Heart                                       | Lung | Spleen | SKM | VA | GM  | LI  | ST  | LI or ST | None |
| This study       | TcVI-CLBR              | Balb/c (F)  | 1x10 <sup>3</sup> BTs i.p.  | 9               | 22                                          | 22   | 22     | 33  | 22 | 33  | 89  | 89  | 100      | 0    |
| This study       | TcVI-CLBR              | Balb/c (M)  | 1x10 <sup>3</sup> BTs i.p.  | 5               | 20                                          | 40   | 20     | 80  | 20 | 80  | 100 | 80  | 100      | 0    |
| Lewis et al 2014 | TcVI-CLBR              | Balb/c (F)  | 1x10 <sup>3</sup> BTs i.p.  | 8 <sup>b</sup>  | 0                                           | 20   | 13     | 25  | 0  | 25  | 88  | 63  | 100      | 0    |
| Lewis et al 2014 | TcVI-CLBR              | Balb/c (F)  | 1x10 <sup>3</sup> BTs s.c.  | 6               | 0                                           | 0    | 0      | 0   | 0  | 0   | 83  | 17  | 83       | 17   |
| Both             | TcVI-CLBR              | Balb/c (F)  | 1x10 <sup>3</sup> BTs i.p.  | 28 <sup>c</sup> | 11                                          | 20   | 14     | 32  | 12 | 32  | 89  | 64  | 96       | 4    |
| This study       | Tcl-X10/6              | Balb/c (F)  | 2x10 <sup>5</sup> TCTs i.p. | 6               | 17                                          | 0    | 17     | 67  | 33 | 100 | 100 | 100 | 100      | 0    |
| This study       | Tcl-JR                 | Balb/c (F)  | 1x10 <sup>3</sup> BTs i.p.  | 10              | 50                                          | 60   | 0      | 60  | 10 | 50  | 80  | 100 | 100      | 0    |
| This study       | TcVI-CLBR              | C57BL/6 (F) | 1x10 <sup>3</sup> BTs i.p.  | 10              | 0                                           | 40   | 40     | 0   | 10 | 80  | 100 | 80  | 100      | 0    |
| This study       | Tcl-JR                 | C57BL/6 (F) | 1x10 <sup>3</sup> BTs i.p.  | 10              | 40                                          | 30   | 0      | 70  | 10 | 70  | 100 | 90  | 100      | 0    |
| This study       | TcVI-CLBR              | C3H/HeN (F) | 1x10 <sup>3</sup> BTs i.p.  | 10              | 10                                          | 60   | 20     | 30  | 10 | 50  | 80  | 60  | 90       | 0    |
| This study       | Tcl-JR                 | C3H/HeN (F) | 1x10 <sup>3</sup> BTs i.p.  | 8               | 88                                          | 88   | 25     | 88  | 75 | 100 | 100 | 100 | 100      | 0    |
| This study       | Tcl-JR                 | C3H/HeN (F) | 1x10 <sup>3</sup> MTs s.c.  | 6               | 100                                         | 100  | 67     | 100 | 50 | 100 | 100 | 100 | 100      | 0    |
| All TcI          |                        |             |                             | 40              | 58                                          | 55   | 18     | 75  | 33 | 80  | 95  | 98  | 100      | 0    |
| All TcVI         |                        |             |                             | 48              | 8                                           | 33   | 21     | 25  | 11 | 46  | 90  | 67  | 96       | 2    |
| All Models       |                        |             |                             | 88              | 31                                          | 44   | 19     | 48  | 21 | 61  | 92  | 81  | 98       | 1    |

M, male; F, female; SKM, skeletal muscle; VA, visceral adipose; GM, gut mesenteries; LI, large intestine; ST, stomach; BT, blood trypomastigotes; MT, metacyclic trypomastigote

<sup>a</sup> survived to end-point

<sup>b</sup> Lewis *et al.* (2014) Cellular Microbiology 16: 1285-1300

<sup>c</sup> lung and adipose n = 5

<sup>d</sup> lung and adipose n = 25
